# Supplementary material for: Integration of network pharmacology, lipidomics, and transcriptomics analysis to reveal the mechanisms underlying the amelioration of AKT-induced nonalcoholic fatty liver disease by total flavonoids in vine tea
Source: Royal Society of Chemistry journal article supplement (doi:10.1039/d4fo00586d), 2024-01-01
Supplement: d4fo00586d1.pdf [file d4fo00586d1.pdf]

## Supplementary Material

### **Integration network pharmacology, lipidomics, and transcriptomics analysis to reveal the mechanisms underlying amelioration of AKT-induced nonalcoholic fatty liver disease by total flavonoids in vine tea**

Siyu Du<sup>a,b,c,1</sup>, Xin Chen<sup>a,c,1</sup>, Rumeng Ren<sup>a,b</sup>, Li Li<sup>a,b</sup>, Baohui Zhang<sup>a,c</sup>, Qi Wang<sup>a,c</sup>, Yan Meng<sup>a,b,c</sup>, Zhenpeng Qiu<sup>a,b,c</sup>, Guihong Wang<sup>a\*</sup>, Guohua Zheng<sup>a,b,c\*</sup> and Junjie Hu<sup>a,b,c\*</sup>

<sup>a</sup>*College of Pharmacy, Hubei University of Chinese Medicine, Wuhan, People's Republic of China*

<sup>b</sup>*Center of Traditional Chinese Medicine Modernization for Liver Diseases, Hubei University of Chinese Medicine, Wuhan, People's Republic of China*

<sup>c</sup>*Hubei Shizhen Laboratory, Wuhan, People's Republic of China*

<sup>1</sup>Siyu Du and Xin Chen contributed equally to this work.

\*Correspondence author: College of Pharmacy, Hubei University of Chinese Medicine, No. 16, West Huangjiahu Road, Wuhan 430065, P.R. China.

E-mail: hero0712@163.com (J. Hu), zgh1227@sina.com (G. Zheng), 843773585@qq.com (G. Wang)

## 1. Supplementary figures

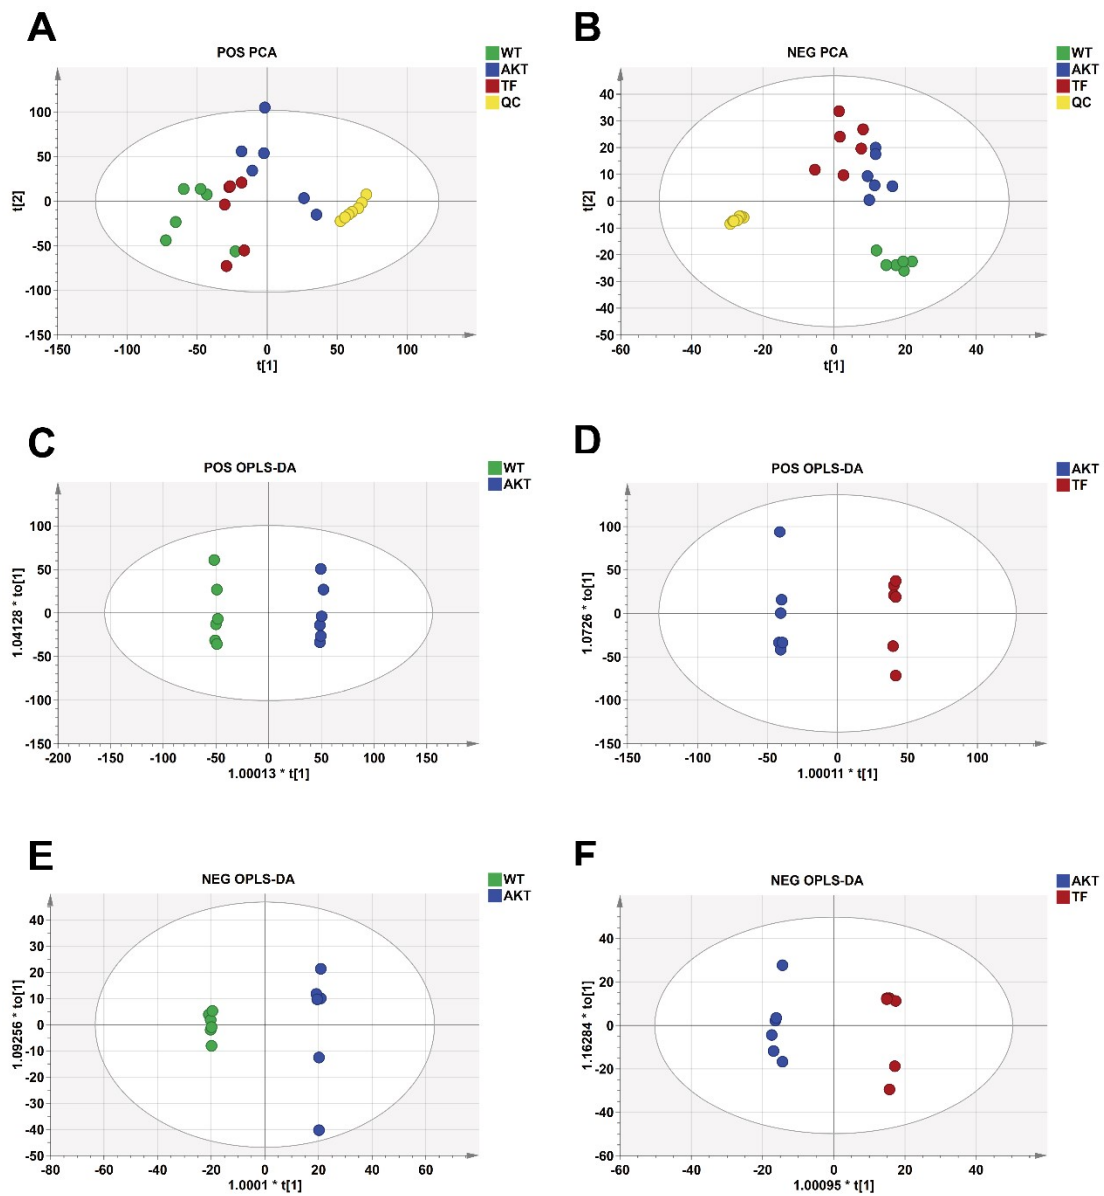

**Fig. S1.** The multivariate statistical analysis of the liver samples of lipidomics. PCA: principal component analysis; OPLS-DA: orthogonal partial least-squares discrimination analysis.

## 2. Supplementary tables

**Table S1.** Mass spectrometric information of the flavonoid compounds in vine tea

| No. | RT     | MS        | Compounds name                                                                                                 | Molecular formula                               | Ion                | MS/MS                                            |
|-----|--------|-----------|----------------------------------------------------------------------------------------------------------------|-------------------------------------------------|--------------------|--------------------------------------------------|
| 1   | 1.069  | 305.0667  | epigallocatechin                                                                                               | C <sub>15</sub> H <sub>14</sub> O <sub>7</sub>  | [M-H] <sup>-</sup> | 125. 0242<br>167. 0351<br>261. 0771              |
| 2   | 3.706  | 639. 0989 | quercetin-3-( 2-caffeoyl)<br>glucuronide                                                                       | C <sub>30</sub> H <sub>24</sub> O <sub>16</sub> | [M-H] <sup>-</sup> | 193. 0152<br>301. 0357<br>319. 0465              |
| 3   | 5.045  | 319. 0472 | ampeloptin                                                                                                     | C <sub>15</sub> H <sub>12</sub> O <sub>8</sub>  | [M-H] <sup>-</sup> | 125. 0216<br>193. 0131<br>257. 0483              |
| 4   | 4.312  | 333. 0242 | Hexahydroxyflavonol                                                                                            | C <sub>15</sub> H <sub>10</sub> O <sub>9</sub>  | [M-H] <sup>-</sup> | 151. 0008<br>289. 0359<br>334.0182<br>316. 0258  |
| 5   | 6.157  | 479. 0853 | myricetin-3-O-galactoside                                                                                      | C <sub>21</sub> H <sub>20</sub> O <sub>13</sub> | [M-H] <sup>-</sup> | 287. 0047<br>271. 0216<br>125. 0236              |
| 6   | 6.653  | 303. 0503 | taxifolin                                                                                                      | C <sub>15</sub> H <sub>12</sub> O <sub>7</sub>  | [M-H] <sup>-</sup> | 150.9998<br>285. 0409                            |
| 7   | 7.198  | 449. 0714 | myricetin-3-O-xyloside                                                                                         | C <sub>20</sub> H <sub>18</sub> O <sub>12</sub> | [M-H] <sup>-</sup> | 316. 0217<br>271. 0250<br>316. 0223              |
| 8   | 7.380  | 463. 0893 | myricitrin                                                                                                     | C <sub>21</sub> H <sub>20</sub> O <sub>12</sub> | [M-H] <sup>-</sup> | 271. 0302<br>151. 0034<br>301.0396               |
| 9   | 4.718  | 609. 1468 | rutin                                                                                                          | C <sub>27</sub> H <sub>30</sub> O <sub>16</sub> | [M-H] <sup>-</sup> | 243.0262<br>179.0031<br>301. 0289                |
| 10  | 9.580  | 447. 0953 | quercetin-3-rhamnoside                                                                                         | C <sub>21</sub> H <sub>20</sub> O <sub>11</sub> | [M-H] <sup>-</sup> | 271. 0235<br>178. 9951<br>151. 0018<br>178. 9983 |
| 11  | 4.959  | 317. 0316 | myricetin                                                                                                      | C <sub>15</sub> H <sub>10</sub> O <sub>8</sub>  | [M-H] <sup>-</sup> | 151. 0034<br>137. 0234<br>319. 0418              |
| 12  | 10.029 | 471. 0580 | 5,7-dihydroxy-4-oxo-(3,4,5-<br>trihydroxyphenyl) -3,4-<br>dihydro-2H-chromen-3-yl-<br>3,4,5-trihydroxybenzoate | C <sub>22</sub> H <sub>16</sub> O <sub>12</sub> | [M-H] <sup>-</sup> | 301. 0313<br>193. 0143<br>125. 0225              |
| 13  | 9.202  | 579. 1744 | naringin                                                                                                       | C <sub>28</sub> H <sub>36</sub> O <sub>13</sub> | [M-H] <sup>-</sup> | 270.7028<br>151. 0053                            |

|    |        |          |                       |                                                 |                    |                                             |
|----|--------|----------|-----------------------|-------------------------------------------------|--------------------|---------------------------------------------|
| 14 | 9.334  | 609.1850 | hesperidin            | C <sub>28</sub> H <sub>34</sub> O <sub>15</sub> | [M-H] <sup>-</sup> | 564.8413<br>01.0396<br>175.0367<br>432.0925 |
| 15 | 11.337 | 431.0986 | kaempferol-rhamnoside | C <sub>21</sub> H <sub>20</sub> O <sub>10</sub> | [M-H] <sup>-</sup> | 285.0413<br>152.7543<br>301.0264            |
| 16 | 13.535 | 301.0364 | quercetin             | C <sub>15</sub> H <sub>10</sub> O <sub>7</sub>  | [M-H] <sup>-</sup> | 179.0003<br>151.0037                        |

**Table S2.** SMILE ID of 11 flavonoid components

| No. | Component                 | Canonical SMLIES                                                                                    |
|-----|---------------------------|-----------------------------------------------------------------------------------------------------|
| 1   | ampeloptin                | <chem>C1=C(C=C(C(=C1O)O)O)C2C(C(=O)C3=C(C=C(C=C3O2)O)O)O</chem>                                     |
| 2   | myricetin-3-O-galactoside | <chem>C1=C(C=C(C(=C1O)O)O)C2=C(C(=O)C3=C(C=C(C=C3O2)O)O)OC4C(C(C(C(O4)CO)O)O)O</chem>               |
| 3   | myricetin-3-O-xyloside    | <chem>C1C(C(C(C(O1)OC2=C(OC3=CC(=CC(=C3C2=O)O)O)C4=CC(=C(C(=C4)O)O)O)O)O)O</chem>                   |
| 4   | myricitrin                | <chem>CC1C(C(C(C(O1)OC2=C(OC3=CC(=CC(=C3C2=O)O)O)C4=CC(=C(C(=C4)O)O)O)O)O)O</chem>                  |
| 5   | rutin                     | <chem>CC1C(C(C(C(O1)OCC2C(C(C(C(O2)OC3=C(OC4=CC(=CC(=C4C3=O)O)O)C5=CC(=C(C=C5)O)O)O)O)O)O)O</chem>  |
| 6   | quercetin-3-rhamnoside    | <chem>CC1C(C(C(C(O1)OC2=C(OC3=CC(=CC(=C3C2=O)O)O)C4=CC(=C(C(=C4)O)O)O)O)O)O</chem>                  |
| 7   | myricetin                 | <chem>C1=C(C=C(C(=C1O)O)O)C2=C(C(=O)C3=C(C=C(C=C3O2)O)O)O</chem>                                    |
| 8   | naringin                  | <chem>CC1C(C(C(C(O1)OC2C(C(C(OC2OC3=CC(=C4C(=O)CC(OC4=C3)C5=CC(=C(C=C5)O)O)CO)O)O)O)O)O</chem>      |
| 9   | hesperidin                | <chem>CC1C(C(C(C(O1)OCC2C(C(C(C(O2)OC3=CC(=C4C(=O)CC(OC4=C3)C5=CC(=C(C=C5)OC)O)O)O)O)O)O)O)O</chem> |
| 10  | kaempferol-rhamnoside     | <chem>CC1C(C(C(C(O1)OC2=C(OC3=CC(=CC(=C3C2=O)O)O)C4=CC(=C(C(=C4)O)O)O)O)O</chem>                    |
| 11  | quercetin                 | <chem>C1=CC(=C(C=C1C2=C(C(=O)C3=C(C=C(C=C3O2)O)O)O)O)O</chem>                                       |

**Table S3.** Differential lipids in liver by UHPLC-QTOF-MS/MS

| No. | Class | Lipid ID           | m/z      | RT<br>(min) | Ion                               | Link         | MS/MS                                      | AKT vs. WT |       |         | TF vs. AKT |       |         |
|-----|-------|--------------------|----------|-------------|-----------------------------------|--------------|--------------------------------------------|------------|-------|---------|------------|-------|---------|
|     |       |                    |          |             |                                   |              |                                            | FC         | Trend | VIP     | FC         | Trend | VIP     |
| 1   | CER   | Cer(d18:1/22:1)    | 619.5895 | 20.55       | [M+H] <sup>+</sup>                | HMDB0011775  | 602.5866<br>620.5857<br>8624.5635          | 2.88       | ↑*    | 1.3915  | -2.16      | ↓     | 1.05273 |
| 2   | SP    | SM(d18:2/22:0)     | 784.6455 | 19.27       | [M+Na] <sup>+</sup>               | HMDB0240633  | 748.5617<br>807.6311<br>393.3302           | 4.59       | ↑*    | 1.44602 | -4.09      | ↓*    | 2.07999 |
| 3   | DG    | DG(16:0/22:2/0:0)  | 648.5694 | 21.10       | [M+NH <sub>4</sub> ] <sup>+</sup> | LMGL02010127 | 631.5695<br>666.6066<br>1.3056             | 17.94      | ↑***  | 1.68369 | -2.99      | ↓*    | 1.43746 |
| 4   | DG    | DG(18:0/22:6/0:0)  | 668.5369 | 18.95       | [M+NH <sub>4</sub> ] <sup>+</sup> | LMGL02010216 | 385.2729<br>65.556<br>686.5723<br>337.2758 | 3.00       | ↑*    | 1.53441 | -3.5       | ↓**   | 1.87118 |
| 5   | DG    | DG(18:1/18:2/0:0)  | 618.5238 | 18.93       | [M+NH <sub>4</sub> ] <sup>+</sup> | HMDB0007247  | 339.2885<br>536.5542                       | 3.89       | ↑**   | 1.82641 | -2.6       | ↓     | 1.73031 |
| 6   | DG    | DG(18:1/22:6/0:0)  | 666.522  | 18.36       | [M+H] <sup>+</sup>                | HMDB0007237  | 385.2761<br>667.5301<br>337.2739           | 2.54       | ↑**   | 1.9018  | -3.85      | ↓*    | 1.10553 |
| 7   | DG    | DG(18:2/18:2/0:0)  | 616.5071 | 18.11       | [M+H] <sup>+</sup>                | LMGL02010063 | 634.5466<br>617.5145                       | 2.42       | ↑*    | 1.36322 | -4.7       | ↓*    | 1.43261 |
| 8   | TG    | TG(18:3/18:1/22:6) | 926.735  | 26.72       | [M+H] <sup>+</sup>                | HMDB0052983  | 944.7786                                   | 2.80       | ↑***  | 1.93927 | 0.409966   | ↓**   | 2.61636 |

|    |    |                         |          |       |                      |                              |                                   |       |      |         |       |      |         |
|----|----|-------------------------|----------|-------|----------------------|------------------------------|-----------------------------------|-------|------|---------|-------|------|---------|
| 9  | CL | CL(18:2_18:2_18:2_18:2) | 1448.971 | 24.64 | [M+NH4] <sup>+</sup> | LMGP12010001,<br>HMDB0010692 | 599.5064<br>1449.972<br>1467.0109 | -2.24 | ↓**  | 1.39174 | -2.09 | ↑*   | 1.20613 |
| 10 | PE | PE(15:0/24:1)           | 787.6103 | 19.10 | [M+H] <sup>+</sup>   | HMDB0008915                  | 788.6164                          | 2.40  | ↑**  | 1.80576 | -2    | ↓    | 1.52323 |
| 11 | PE | PE(16:0/18:0)           | 719.5511 | 17.59 | [M+H] <sup>+</sup>   | LMGP02011225                 | 720.5572                          | 2.31  | ↑    | 1.26425 | -2.43 | ↓    | 1.2863  |
| 12 | PE | PE(16:1/24:1)           | 799.6118 | 18.74 | [M+H] <sup>+</sup>   | HMDB0009749                  | 800.6194<br>283.2347              | 2.20  | ↑**  | 1.57645 | -4.28 | ↓**  | 2.23853 |
| 13 | PE | PE(18:0/22:6)           | 791.55   | 17.63 | [M-H] <sup>-</sup>   | LMGP02010094                 | 327.2337<br>790.5343              | 2.43  | ↑**  | 1.10175 | -2.07 | ↓*** | 1.88866 |
| 14 | PE | PE(19:0/22:2)           | 813.6256 | 19.19 | [M+H] <sup>+</sup>   | LMGP02010790                 | 814.6326                          | 4.46  | ↑**  | 2.00892 | -2.36 | ↓*   | 1.93712 |
| 15 | PE | PE(24:1/16:0)           | 801.6259 | 19.69 | [M+H] <sup>+</sup>   | HMDB0009748                  | 802.6349                          | 6.15  | ↑*** | 1.69752 | -3.79 | ↓*** | 1.91773 |
| 16 | PE | PE(O-18:0/20:5)         | 751.5533 | 18.60 | [M+H] <sup>+</sup>   | LMGP02020008                 | 611.5405<br>752.5603              | 4.07  | ↑*** | 1.77163 | -3.09 | ↓**  | 2.203   |
| 17 | PC | PC(16:1/20:2)           | 783.5794 | 17.81 | [M+H] <sup>+</sup>   | LMGP01011490<br>HMDB0008012  | 184.0735<br>784.5872              | 2.34  | ↑**  | 1.01941 | -2.23 | ↓*   | 1.18089 |
| 18 | PC | PC(18:0/18:4)           | 781.5619 | 18.78 | [M+H] <sup>+</sup>   | LMGP01010773                 | 184.0733<br>782.5712              | 2.90  | ↑**  | 1.71183 | -2.41 | ↓*   | 1.94402 |
| 19 | PC | PC(18:2/20:5)           | 803.5452 | 16.15 | [M+H] <sup>+</sup>   | LMGP01011634<br>HMDB0008149  | 184.0732<br>804.5583              | 11.85 | ↑*** | 1.77839 | -2.37 | ↓*   | 1.28337 |
| 20 | PC | PC(19:1/18:4)           | 793.5633 | 16.72 | [M+H] <sup>+</sup>   | HMDB0009011                  | 653.5572<br>794.5673              | 2.17  | ↑*   | 1.83393 | -2.73 | ↓*   | 2.09641 |
| 21 | PC | PC(20:2/20:2)           | 837.6263 | 18.70 | [M+H] <sup>+</sup>   | LMGP01011856<br>HMDB0008342  | 184.0721<br>538.6312              | 2.30  | ↑**  | 1.73932 | -2.02 | ↓    | 1.38986 |
| 22 | PC | PC(O-18:1/16:0)         | 745.5999 | 18.70 | [M+H] <sup>+</sup>   | LMGP01020152<br>HMDB0013424  | 184.0725<br>746.6009              | 2.19  | ↑**  | 1.47636 | -2.12 | ↓*   | 1.18087 |

|    |     |               |          |       |                    |              |                                                          |      |      |         |       |      |         |
|----|-----|---------------|----------|-------|--------------------|--------------|----------------------------------------------------------|------|------|---------|-------|------|---------|
| 23 | PS  | PS(18:1/20:2) | 813.55   | 19.30 | [M-H] <sup>-</sup> | LMGP03010334 | 281.2492<br>812.5412                                     | 2.22 | ↑*** | 1.45578 | -2.26 | ↓*** | 1.35931 |
| 24 | PS  | PS(19:0/22:6) | 849.55   | 16.18 | [M-H] <sup>-</sup> | LMGP03010479 | 283.2506<br>327.2308<br>848.5472                         | 2.23 | ↑**  | 1.22955 | -2.25 | ↓*** | 1.36956 |
| 25 | PS  | PS(20:1/21:0) | 859.63   | 19.29 | [M-H] <sup>-</sup> | LMGP03010552 | 309.2774<br>858.621                                      | 2.31 | ↑*** | 1.68236 | -2.26 | ↓*** | 1.20287 |
| 26 | PI  | PI(16:0/18:2) | 834.52   | 16.66 | [M-H] <sup>-</sup> | LMGP06010959 | 152.9949<br>255.233<br>409.2322                          | 3.20 | ↑*** | 1.48985 | -2.34 | ↓*** | 1.07798 |
| 27 | LPC | LysoPC(17:0)  | 509.3488 | 6.94  | [M+H] <sup>+</sup> | LMGP01050024 | 833.5178<br>184.0734<br>510.3558                         | 3.96 | ↑**  | 1.37581 | -2.25 | ↓    | 1.20769 |
| 28 | LPC | LysoPC(18:1)  | 521.3492 | 5.04  | [M+H] <sup>+</sup> | HMDB0061701  | 184.0731<br>504.3462                                     | 3.59 | ↑*** | 1.86252 | -2.09 | ↓*   | 1.52456 |
| 29 | LPC | LysoPC(19:0)  | 537.3796 | 12.24 | [M+H] <sup>+</sup> | LMGP01050041 | 5223564<br>184.0746<br>520.3822                          | 3.01 | ↑*   | 1.10935 | -3.68 | ↓**  | 1.47399 |
| 30 | LPE | LysoPE(16:0)  | 453.2859 | 5.01  | [M+H] <sup>+</sup> | HMDB0011473  | 538.385<br>313.2789<br>436.2806                          | 2.26 | ↑**  | 1.23619 | -2.09 | ↓*   | 1.1344  |
| 31 | LPE | LysoPE(18:1)  | 479.3048 | 5.12  | [M+H] <sup>+</sup> | HMDB0011475  | 454.2965<br>198.0546<br>216.0602<br>339.2904<br>480.3104 | 3.23 | ↑*** | 1.65184 | -2.4  | ↓    | 1.34276 |

|    |     |              |         |      |                    |             |          |      |     |         |       |    |         |  |
|----|-----|--------------|---------|------|--------------------|-------------|----------|------|-----|---------|-------|----|---------|--|
| 32 | LPE | LysoPE(22:6) | 525.286 | 3.09 | [M+H] <sup>+</sup> | HMDB0011496 | 142.0275 |      |     |         |       |    |         |  |
|    |     |              |         |      |                    |             | 216.0609 | 2.54 | ↑** | 1.26637 | -2.42 | ↓* | 1.24282 |  |
|    |     |              |         |      |                    |             | 385.2729 |      |     |         |       |    |         |  |
|    |     |              |         |      |                    |             | 526.2938 |      |     |         |       |    |         |  |

---

↑ indicates increase; ↓ indicates decrease \*  $p < 0.05$ , \*\* $p < 0.01$ , \*\*\* $p < 0.001$



**Table S4.** Primer sequences for RT-qPCR analysis

| Gene     | Forward primer sequence (5'-3') | Reverse primer sequence (5'-3') |
|----------|---------------------------------|---------------------------------|
| GAPDH    | GGCAAATTCAACGGCACAGTCAA         | GACATACTCAGCACCGGCCTCAC         |
| PPARG    | TGTTCCGCAAGGTGCTCCAG            | TGAAGGCTCATGTCTGTCTCTGTC        |
| SCD1     | GGTGAACAGTGCCGCGCATCTC          | GTGTGGTGGTAGTTGTGGAAGCC         |
| CHPT1    | CATCAACCTGGTCACCACAC            | CCCAGGGCACATAAAAGGTA            |
| PLA2G12B | CCACTCAATCTGCTCCGACCTC          | ACACGGTATCAGCCAGAGAATCAC        |
| DGKZ     | GGAGAACAGACAGCATTACCAGATG       | GACAGGAATGTGGCAGTGAGATG         |
